# Supplementary material for: In Vitro and In Silico Characterization of Crocatin A from Red Betel Leaves: Targeting DNA Gyrase B and DNA Ligase of Enterococcus faecalis with ADMET-Based Druglikeness Analysis
Source: Research Square preprint supplement (doi:10.21203/rs.3.rs-7015807/v1), 2025-08-04
Supplement: Supplementary file 1 [file 305f00dd3cae9574f729b51c.docx]

**SUPPLEMENTARY INFORMATION**

**In Vitro and In Silico Characterization of Crocatin A from Red Betel Leaves: Targeting DNA Gyrase B and DNA Ligase of *Enterococcus faecalis* with ADMET-Based Druglikeness Analysis**

Devi Meliani,1 Trisna Yuliana2, Dikdik Kurnia1*

1Chemistry Department, Faculty of Mathematics and Natural Sciences, Universitas Padjadjaran, West Java, Indonesia; 2Chemistry Department, Faculty of Science, Jendral Achmad Yani University, West Java, Indonesia

Corresponding author: Dikdik Kurnia; dikdik.kurnia@unpad.ac.id


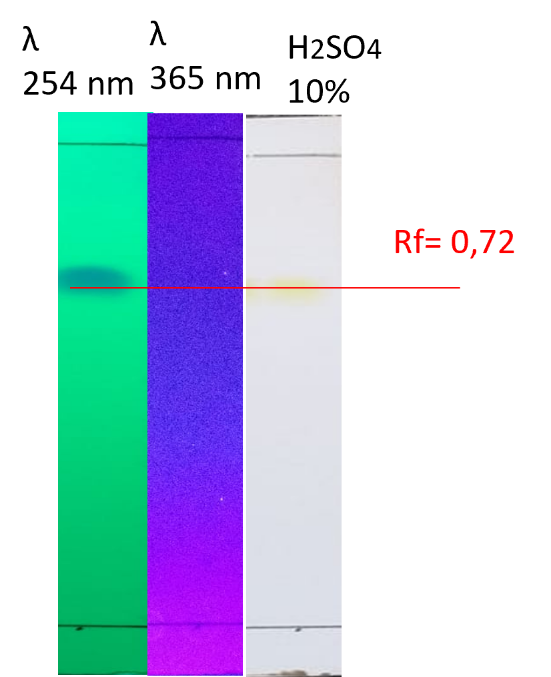


**Figure S1**. Thin layer chromatographic analysis of Crocatin A

Stationary phase: Silica G 60 F254

Mobile phase: *n*-hexane – ethyl acetate (3:7)


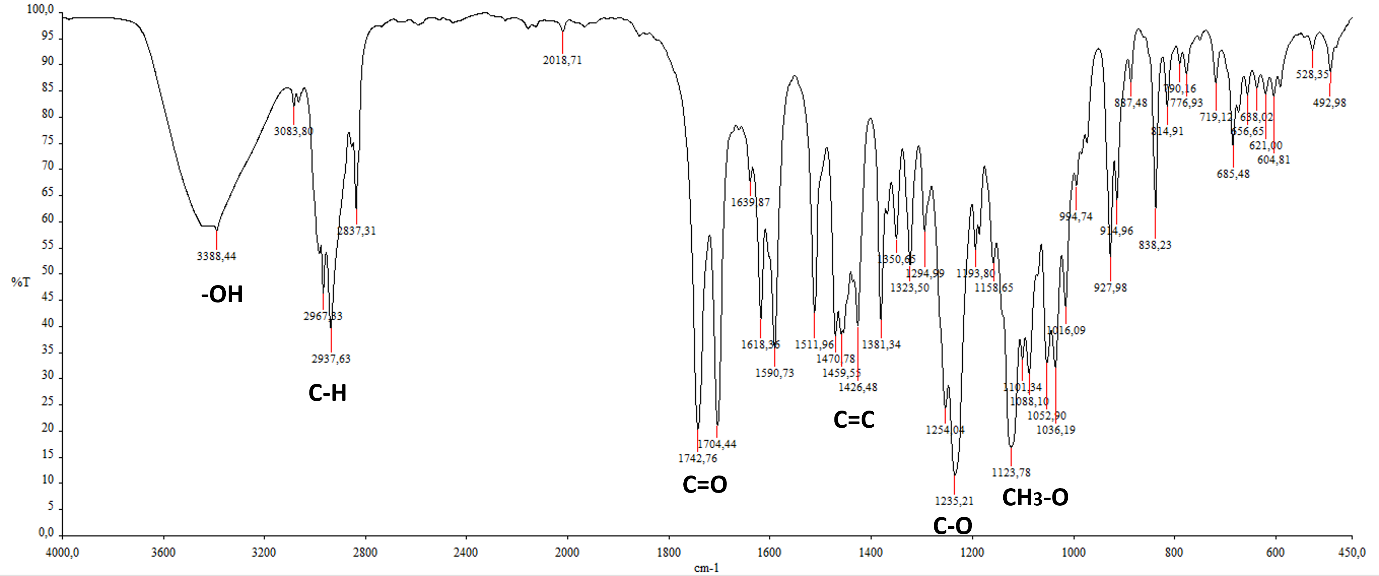


**Figure S2. IR spectrum from Compound 1 (in KBr)**

**
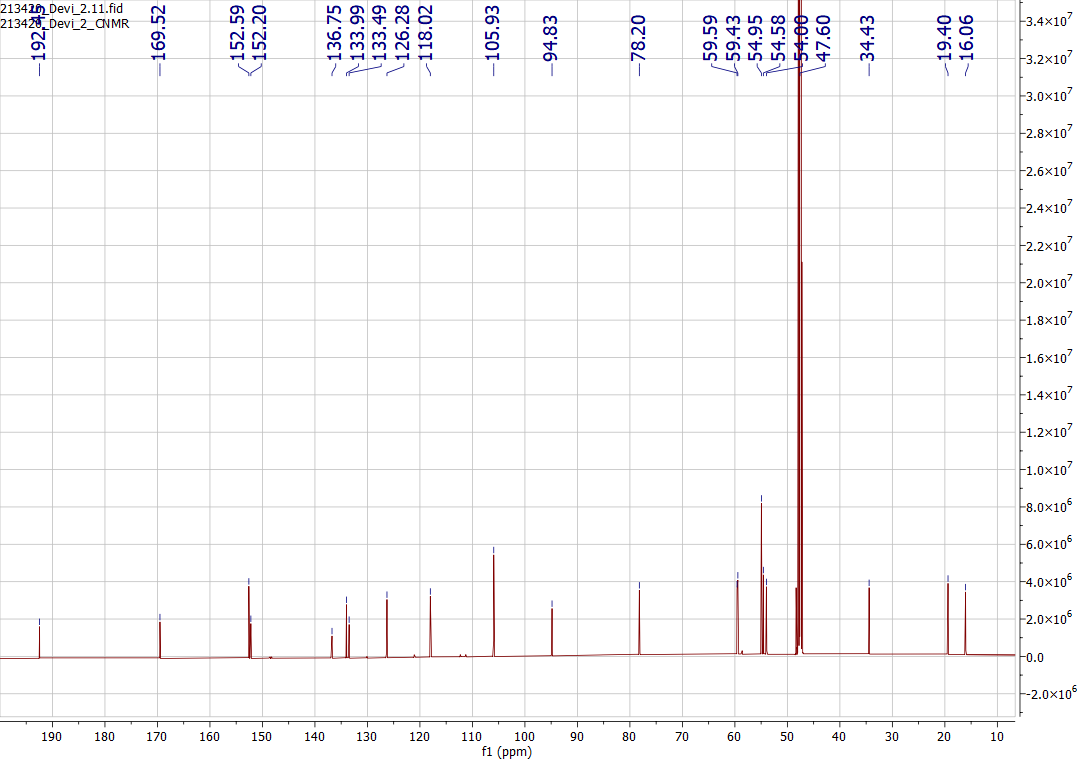
**

**Figure S3. 13C-NMR spectrum from Compound 1**

**
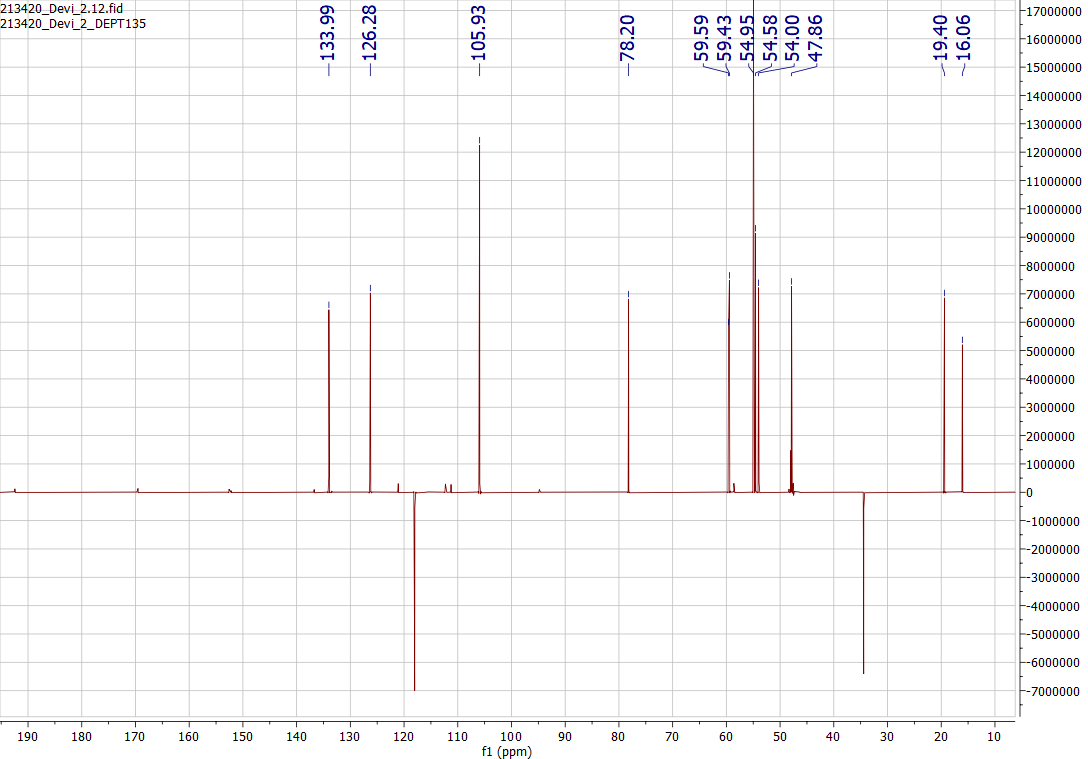
**

**Figure S4. DEPT spectrum from Compound 1**


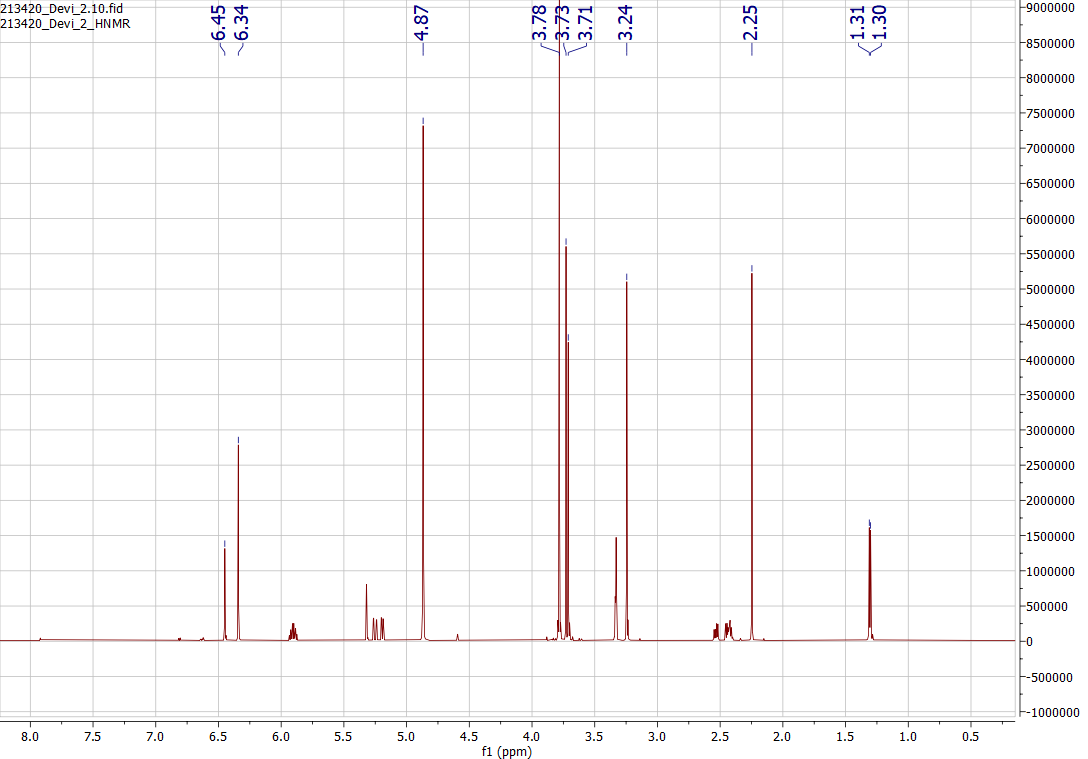


**Figure S5. 1H-NMR spectrum from Compound 1**

**
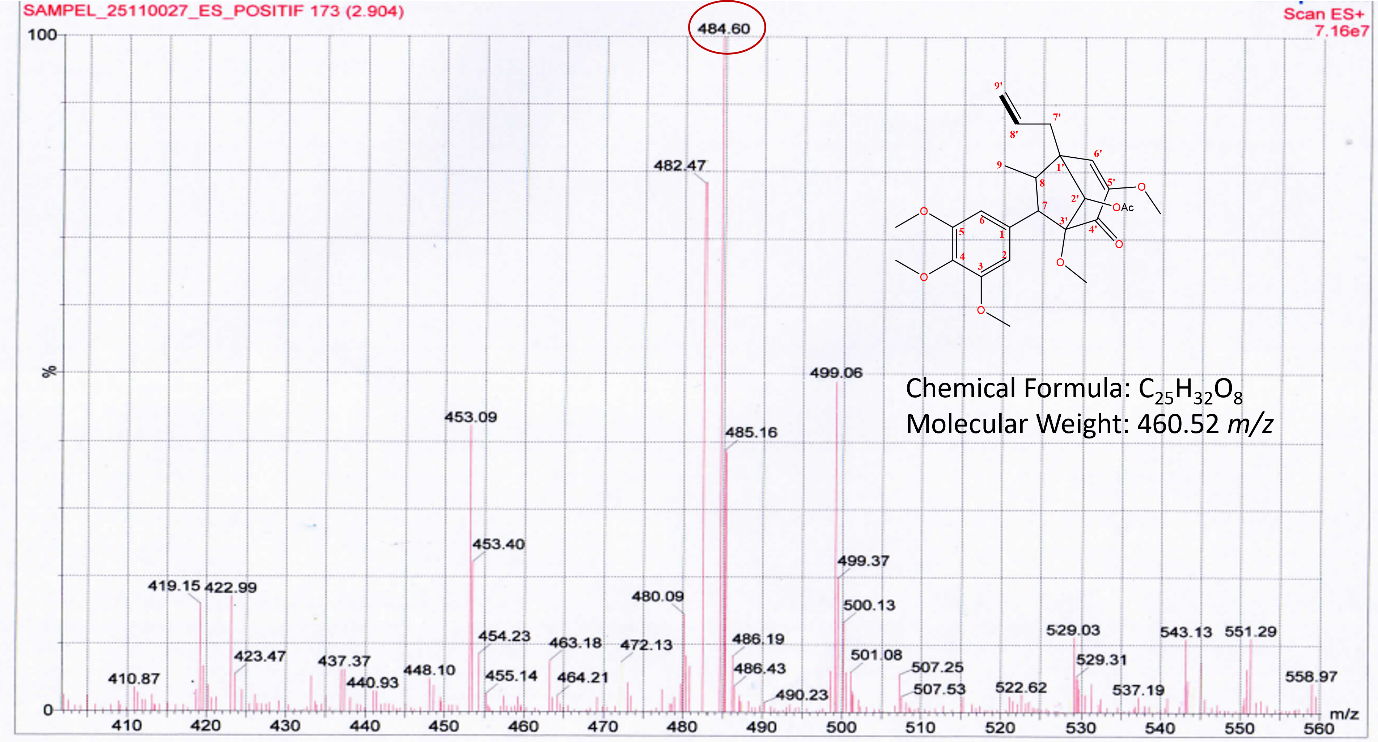
**

**Figure S6. MS spectrum from Compound 1**

**
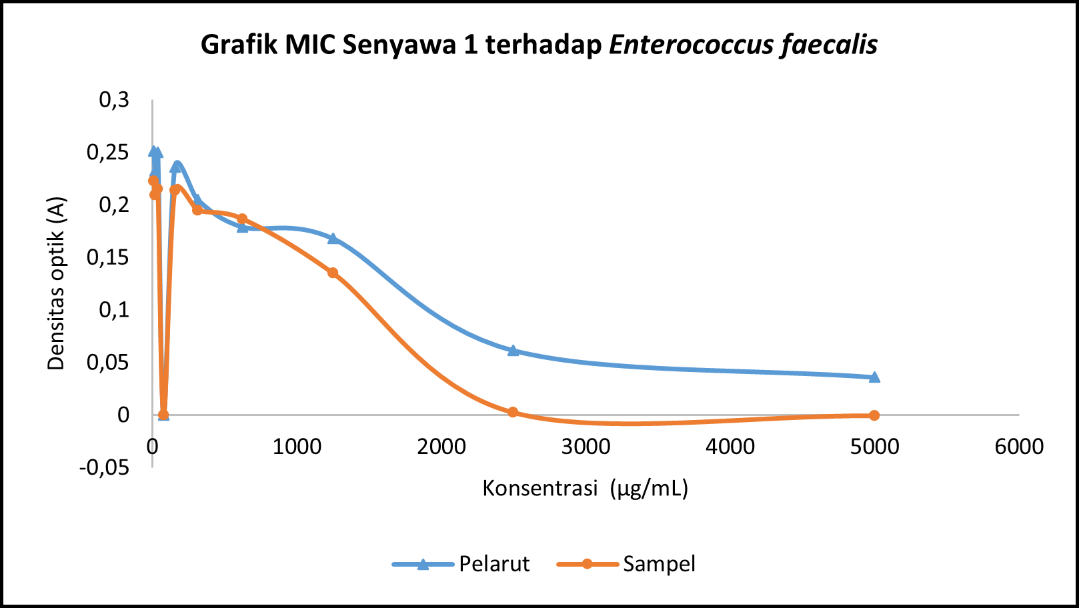
**

**Figure S7. MIC curve of compound 1 against E. faecalis. The MIC is the lowest concentration that results in reduction of the viability of an inoculum of a microorganism.**

**References**

[1] M.O. Aliba, I.G. Ndukwe, H. Ibrahim, Isolation and characterization of Β-sitosterol from methanol extracts of the stem bark of large- leaved rock fig (Ficus abutilifolia Miq.), Journal of Applied Sciences and Environmental Management 22 (2018) 1639. https://doi.org/10.4314/jasem.v22i10.19.

[2] Erwin, W.R. Pusparohmana, R.D. Safitry, E. Marliana, Usman, I.W. Kusuma, Isolation and characterization of stigmasterol and beta-sitosterol from wood bark extract of Baccaurea macrocarpa Miq. Mull. Arg, Rasayan Journal of Chemistry 13 (2020) 2552–2558. https://doi.org/10.31788/RJC.2020.1345652.
